# Supplementary material for: A surface modifier enhances the performance of the all-inorganic CsPbI2Br perovskite solar cells with efficiencies approaching 15%
Source: Royal Society of Chemistry journal article supplement (doi:10.1039/d0cp01437k), 2020-01-01
Supplement: d0cp01437k1.pdf [file d0cp01437k1.pdf]

## A Surface Modifier Enhances Performance in All-Inorganic CsPbI<sub>2</sub>Br Perovskite Solar Cells with Efficiencies Approaching 15%

Kaiyuan Wang,<sup>ab</sup> Jiyu Zhou,<sup>b</sup> Xing Li,<sup>b</sup> Nafees Ahmad,<sup>c</sup> Haoran Xia,<sup>c</sup> Guangbao Wu,<sup>b</sup> Xuning Zhang,<sup>b</sup> Boxing Wang,<sup>c</sup> Dongyang Zhang,<sup>b</sup> Yu Zou,<sup>a,\*</sup> Huiqiong Zhou,<sup>c,\*</sup> Yuan Zhang<sup>b,\*</sup>

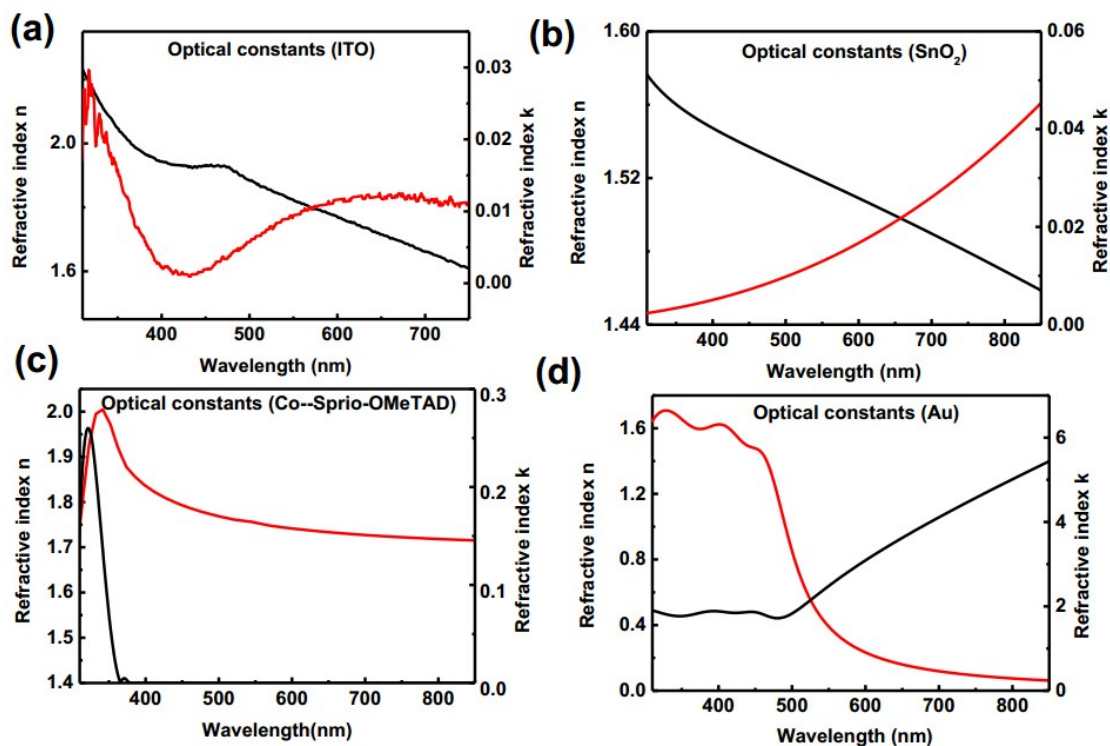

| Function layer | Material         | Thickness d (nm) |
|----------------|------------------|------------------|
| Electrode      | ITO              | 75nm             |
| ELFs           | SnO <sub>2</sub> | 28 nm            |
| Electrode      | Au               | 60 nm            |
| HLFs           | Spiro-OMETAD     | 30 nm            |

Fig. S1. Optical constants used for the simulation of perovskite solar cells (PSC). (a) ITO, (b) SnO<sub>2</sub>, and (c) Spiro-OMETAD (Co), and (d) Au used as input for the optical analysis. Also shown in the associated table are the thicknesses of different functional layers determined by profilometry.

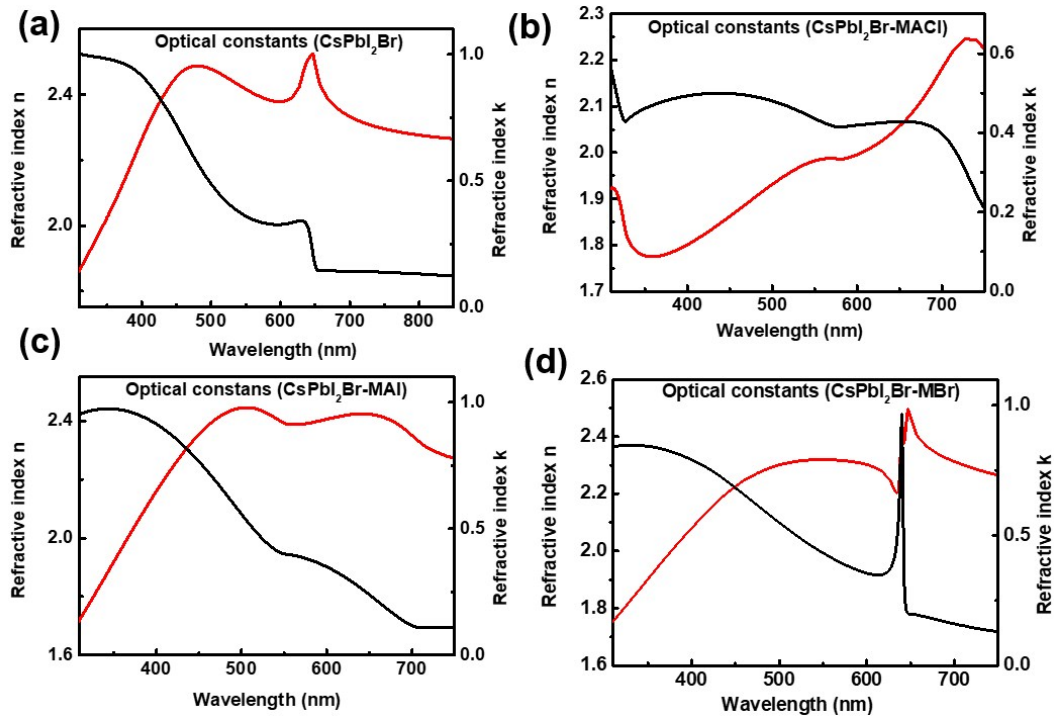

|                       | Material                   | Thickness d (nm) |
|-----------------------|----------------------------|------------------|
|                       | CsPbI <sub>2</sub> Br      | 439 nm           |
| CsPbI <sub>2</sub> Br | CsPbI <sub>2</sub> Br-MABr | 441 nm           |
| -MAX (Cl, I, Br)      | CsPbI <sub>2</sub> Br-MACl | 449 nm           |
|                       | CsPbI <sub>2</sub> Br-MAI  | 441 nm           |

Fig. S2. Angle-varied spectroscopic ellipsometry measurements used for the simulation of perovskite solar cells. Optical constants of CsPbI<sub>2</sub>Br PSCs with different passivation layers used as input parameters for the optical analysis and full simulation of solar cells. (a) CsPbI<sub>2</sub>Br, (b) CsPbI<sub>2</sub>Br-MABr, (c) CsPbI<sub>2</sub>Br-MACl, and (d) CsPbI<sub>2</sub>Br-MAI. In the associated table, thicknesses of active layer and MAX measured from a step profiler are summarized.

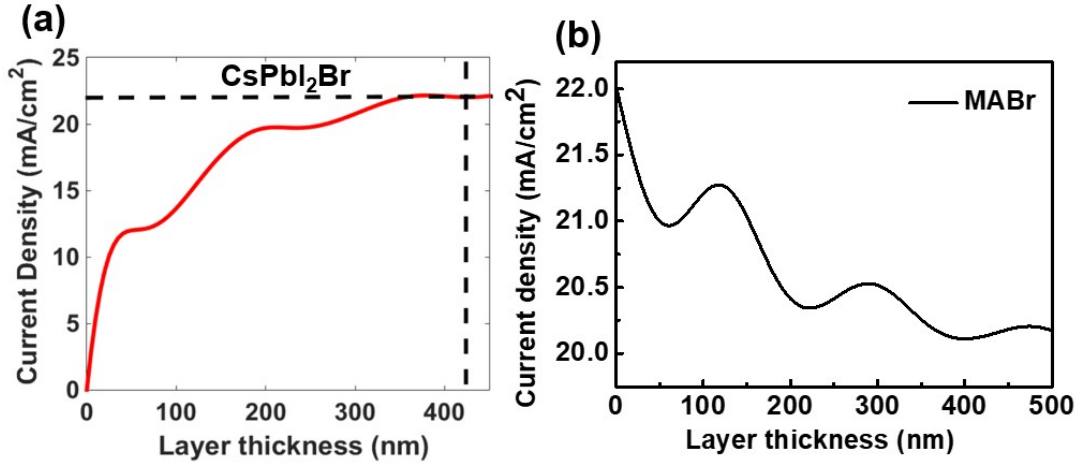

Fig. S3. Calculated photocurrent in different positions inside the CsPbI<sub>2</sub>Br perovskite solar cells (a) without and (b) with MABr passivation layer (Current density obtained by from 100% IQE).

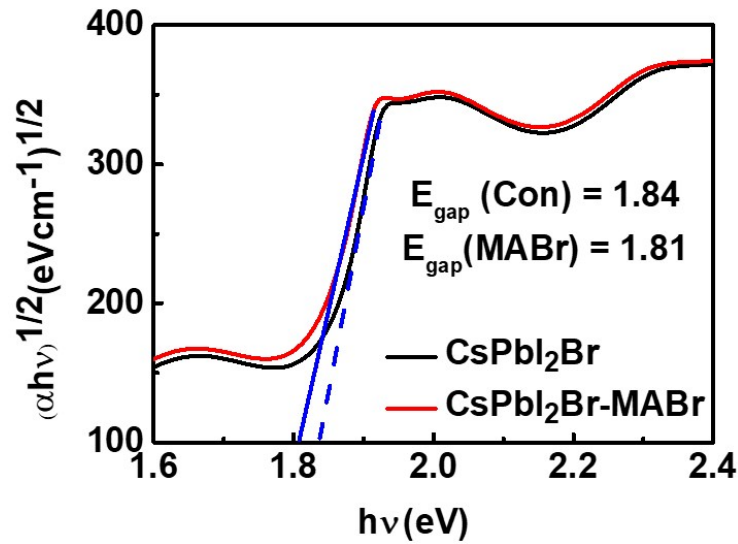

Fig. S4. UV-Vis absorption spectra of the CsPbI<sub>2</sub>Br and CsPbI<sub>2</sub>Br-MABr film (Tauc method).  $h\nu = 1240/\lambda$

, absorption coefficient spectrum:  $\alpha = \frac{1}{d} \times \ln(1/T)$ ,  $d$  is thickness of active layer. The picture of Tauc,  $(\alpha h\nu)^{1/2} \sim h\nu$ , the unit of  $\alpha$  is  $\text{cm}^{-1}$  and the unit of  $h\nu$  is eV.

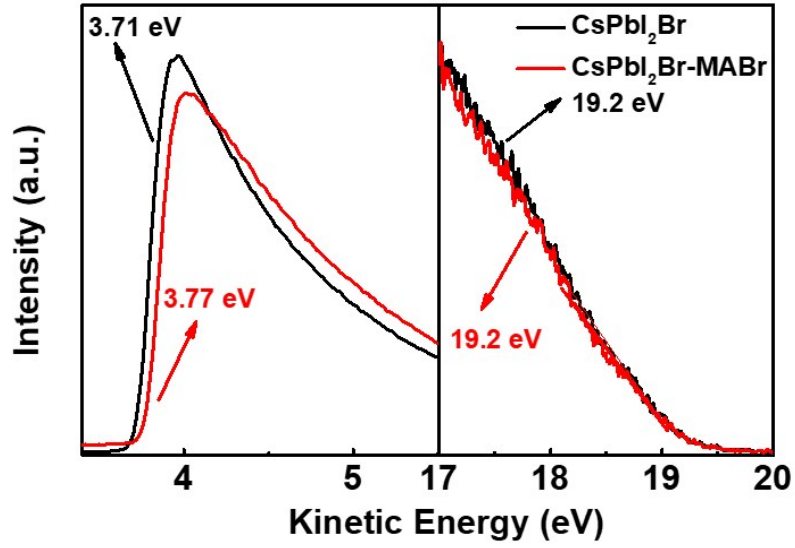

Fig. S5. UPS spectra measured on CsPbI<sub>2</sub>Br and CsPbI<sub>2</sub>Br-MABr films. Work function  $\phi$ :  $h\nu - \phi = E_{feimi} - E_{cutoff}$ ,  $h\nu = 21.2\text{eV}$  and the value of  $E_{feimi}$  from the Au.

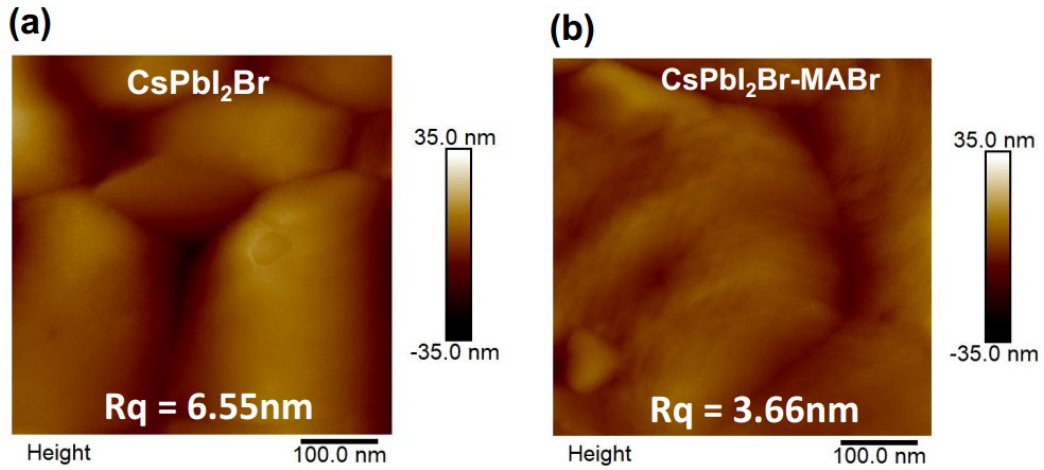

Fig. S6. Topographic images of (a) CsPbI<sub>2</sub>Br and (b) CsPbI<sub>2</sub>Br-MABr films measured at the grain boundaries with atomic force microscopy.

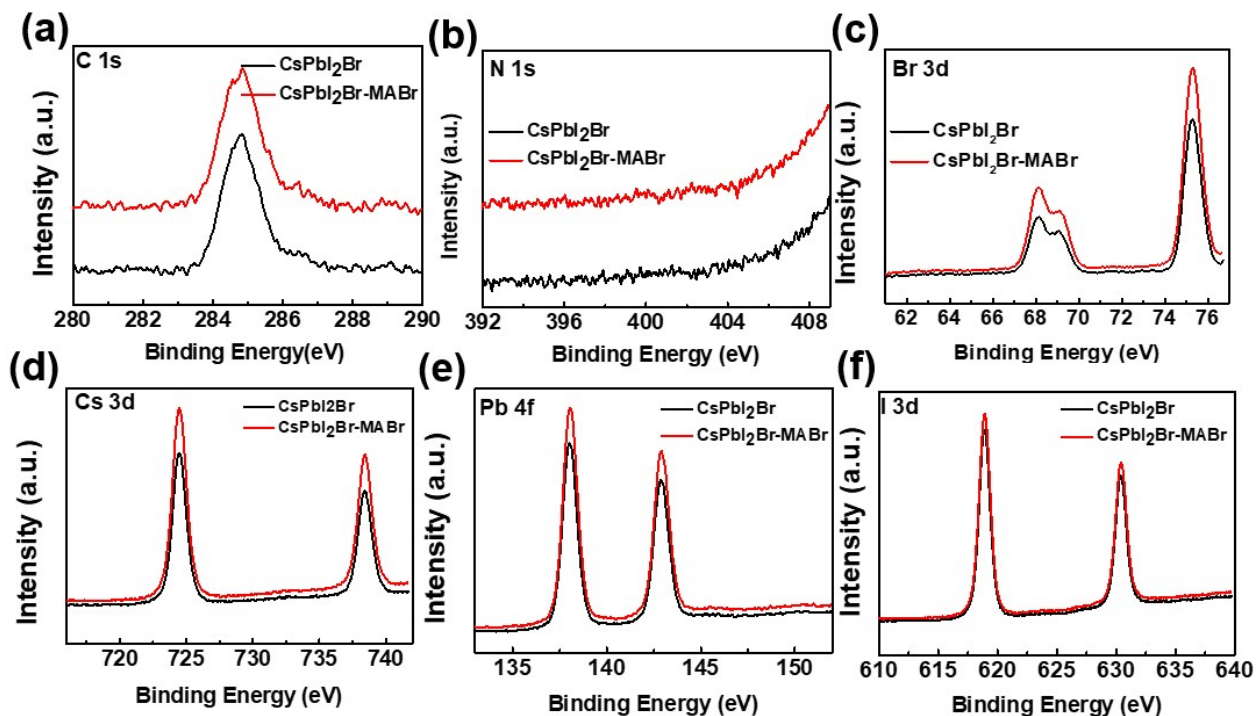

Figure. S7. High resolution XPS of CsPbI<sub>2</sub>Br and CsPbI<sub>2</sub>Br-MABr probed on core-level (a) C 1s, (b) N 1s, (c) Br 3d, (d) Cs 3d, (e) Pb 4f and (f) I 3d.

Table. S1. The statistical analysis of element contents on the surface of CsPbI<sub>2</sub>Br-MABr thin films.

|                            | Element | Br 3d | Pb 4f | C 1s | I 3d | Cs 3d |
|----------------------------|---------|-------|-------|------|------|-------|
| CsPbI <sub>2</sub> Br      | wt.%    | 13.6  | 13.3  | 22.2 | 29.5 | 17.6  |
| CsPbI <sub>2</sub> Br-MABr | wt.%    | 16.3  | 13.0  | 21.2 | 27.0 | 19.0  |

Table. S2. Device parameters along statistics of CsPbI<sub>2</sub>Br solar cells prepared by passivation methods measured in the reverse scan directions under AM 1.5 G solar illumination.

| Processing                 | V <sub>oc</sub> (V) | J <sub>sc</sub> (mA/cm <sup>2</sup> ) | FF (%)     | PCE (%)      |
|----------------------------|---------------------|---------------------------------------|------------|--------------|
| CsPbI <sub>2</sub> Br      | 1.20 (± 0.2)        | 14.1 (± 0.3)                          | 68.4 (± 2) | 12.8 (± 1)   |
| CsPbI <sub>2</sub> Br-MABr | 1.23 (± 0.1)        | 14.9 (± 0.2)                          | 79.2 (± 3) | 14.0 (± 0.8) |

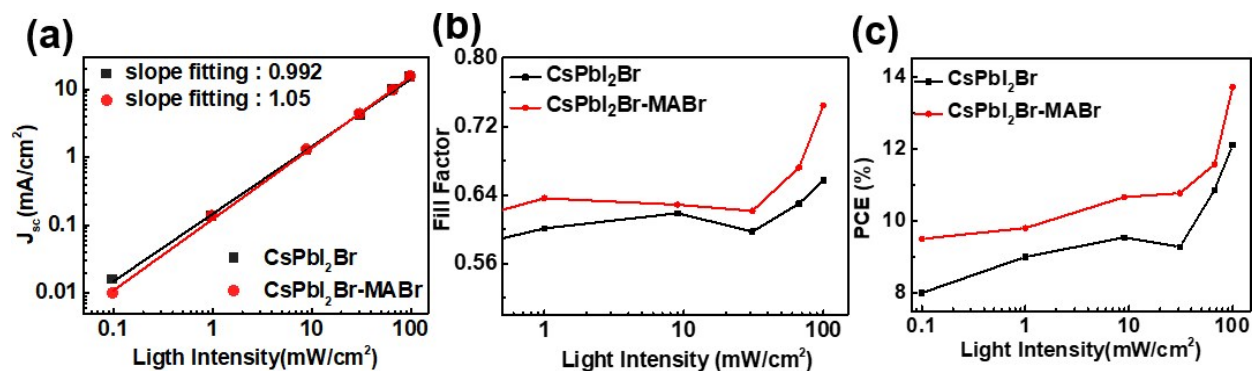

Fig. S8. Light intensity-dependent (a) Short-circuit current, (b) Fill factor, (c) Power conversion efficiency of CsPbI<sub>2</sub>Br and CsPbI<sub>2</sub>Br-MABr solar cells.

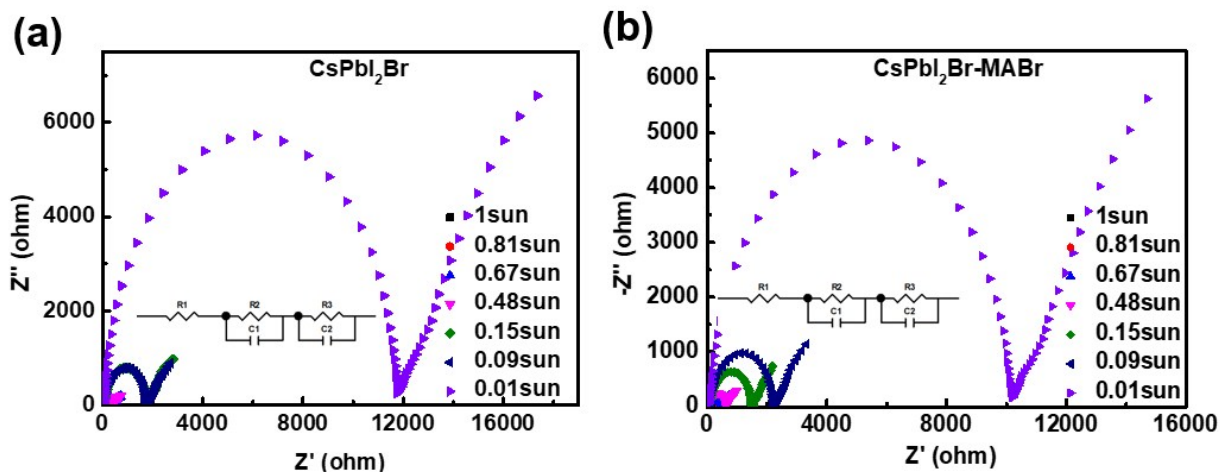

Fig. S9. Impedance spectra of CsPbI<sub>2</sub>Br solar cells with and without MABr passivation layers measured at different light intensities ( $P_{\text{light}}$ ).

Table. S3. Device parameters of impedance spectroscopy of CsPbI<sub>2</sub>Br and CsPbI<sub>2</sub>Br-MABr solar cells measured under 1 sun at  $V_{\text{oc}}$  together.

|                            | $R_1$ ( $\Omega$ ) | $R_2$ ( $\Omega$ ) | $R_3$ ( $\Omega$ ) | $C_1$ (F)                          | $C_2$ (F)             |
|----------------------------|--------------------|--------------------|--------------------|------------------------------------|-----------------------|
| CsPbI <sub>2</sub> Br      | 48.6 ( $\pm$ 4)    | 207 ( $\pm$ 1)     | 19.3 ( $\pm$ 6)    | 7.63 ( $\pm$ 0.3) $\times 10^{-9}$ | 0.0023 ( $\pm$ 0.001) |
| CsPbI <sub>2</sub> Br-MABr | 64.9 ( $\pm$ 3)    | 194 ( $\pm$ 6)     | 251 ( $\pm$ 1)     | 5.16 ( $\pm$ 0.3) $\times 10^{-9}$ | 0.0030 ( $\pm$ 0.001) |

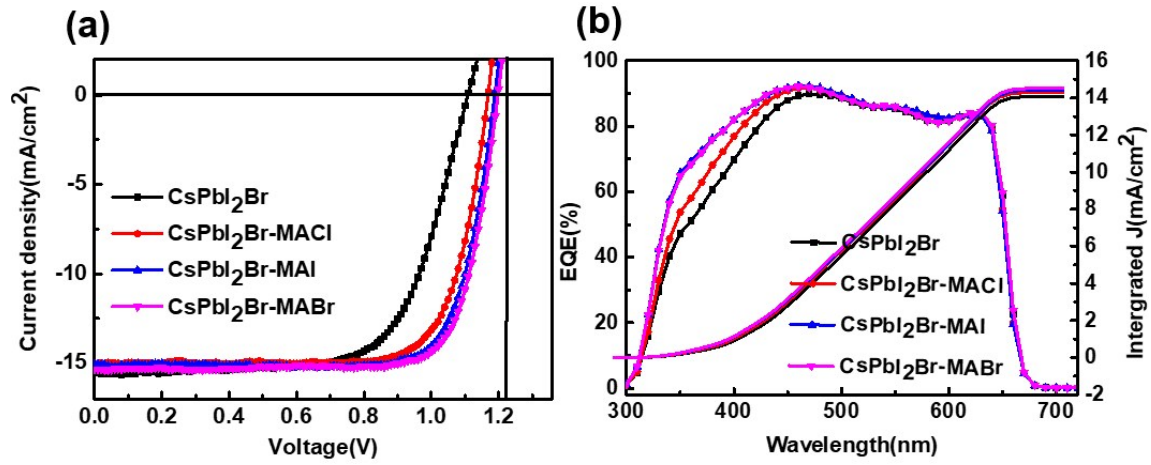

Fig. S10. (a) J-V characteristics of best CsPbI<sub>2</sub>Br and CsPbI<sub>2</sub>Br-MAX (X = Cl, Br, and I) solar under simulated AM 1.5G illumination (100 mW/cm<sup>2</sup>), (b) EQE spectra of according devices.

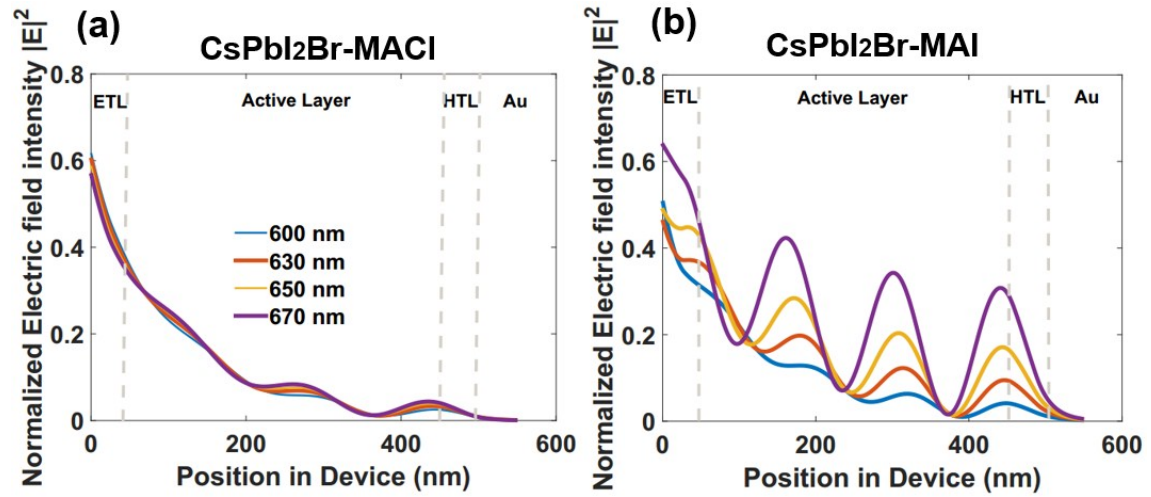

Fig. S11 (a-b) Simulated electric field intensities induced by propagation of various wavelengths of light through (a) CsPbI<sub>2</sub>Br-MACl, (b) CsPbI<sub>2</sub>Br-MAI.
